# Supplementary material for: Patient Experience from an eHealth Perspective: A Scoping Review of Approaches and Recent Trends
Source: PubMed Central journal article supplement — Yearb Med Inform. 2022 Dec 4;31(1):136–45. doi: 10.1055/s-0042-1742515 (PMC9719751; doi:10.1055/s-0042-1742515), 2022-12-04
Supplement: 10-1055-s-0042-1742515-sviitanen.pdf [file 10-1055-s-0042-1742515-sviitanen.pdf]

## Appendix 1: Selected articles for detailed review

| Reference Number | Publication Name                             | Year | Article Title                                                                                                      | Author(s)                                                                | URL                                                                                                                                                                       |
|------------------|----------------------------------------------|------|--------------------------------------------------------------------------------------------------------------------|--------------------------------------------------------------------------|---------------------------------------------------------------------------------------------------------------------------------------------------------------------------|
| [43]             | International Journal of Medical Informatics | 2019 | Advantages of mobile health in the management of adult patients with congenital heart disease                      | Kauw D, Koole MAC, Winter MM, Dohmen DAJ, Tulevski II, Blok S, et al.    | <a href="https://doi.org/10.1016/j.ijmedinf.2019.104011">https://doi.org/10.1016/j.ijmedinf.2019.104011</a>                                                               |
| [55]             | International Journal of Medical Informatics | 2020 | Exploring how virtual primary care visits affect patient burden of treatment                                       | Kelley LT, Phung M, Stamenova V, Fujioka J, Agarwal P, Onabajo N, et al. | <a href="https://doi.org/10.1016/j.ijmedinf.2020.104228">https://doi.org/10.1016/j.ijmedinf.2020.104228</a>                                                               |
| [39]             | International Journal of Medical Informatics | 2021 | From telehealth to virtual primary care in Australia? A Rapid scoping review                                       | Jonnagaddala J, Godinho MA, Liaw S-T                                     | <a href="https://doi.org/10.1016/j.ijmedinf.2021.104470">https://doi.org/10.1016/j.ijmedinf.2021.104470</a>                                                               |
| [59]             | Applied Clinical Informatics                 | 2019 | Empowering Patients during Hospitalization: Perspectives on Inpatient Portal Use                                   | McAlearney A, Fareed N, Gaughan A, MacEwan S, Volney J, Sieck C          | <a href="https://www.thieme-connect.com/products/ejournals/html/10.1055/s-0039-1677722">https://www.thieme-connect.com/products/ejournals/html/10.1055/s-0039-1677722</a> |
| [45]             | Patient Experience Journal                   | 2019 | A novel mobile biobehavioral regulation system for personalized trauma recovery support                            | Matto H, Seshaiyer P, Newcomb A, Rothberg S, Lopez-Piper A               | <a href="https://pxjournal.org/cgi/viewcontent.cgi?article=1369&amp;context=journal">https://pxjournal.org/cgi/viewcontent.cgi?article=1369&amp;context=journal</a>       |
| [49]             | Patient Experience Journal                   | 2019 | Transformations in health information technology and the impact on patient experience                              | Sieck CJ, Huerta TR                                                      | <a href="https://pxjournal.org/cgi/viewcontent.cgi?article=1391&amp;context=journal">https://pxjournal.org/cgi/viewcontent.cgi?article=1391&amp;context=journal</a>       |
| [44]             | Patient Experience Journal                   | 2019 | Representing the patient experience of heart failure through empathy, journey and stakeholder mapping              | Woods L, Duff J, Roehrer E, Walker K, Cummings E                         | <a href="https://pxjournal.org/cgi/viewcontent.cgi?article=1324&amp;context=journal">https://pxjournal.org/cgi/viewcontent.cgi?article=1324&amp;context=journal</a>       |
| [29]             | Patient Experience Journal                   | 2019 | Assessing capacity to engage in healthcare to improve the patient experience through health information technology | Sieck CJ, Walker DM, Gregory M, Fareed N, Hefner JL                      | <a href="https://pxjournal.org/journal/vol6/iss2/7/">https://pxjournal.org/journal/vol6/iss2/7/</a>                                                                       |
| [18]             | Patient Experience Journal                   | 2019 | Seven steps to successful change: How a large academic medical center prepared patients for organizational change  | Carlson B, Agee M, Smith T, Sternberg P, Morgan J                        | <a href="https://pxjournal.org/cgi/viewcontent.cgi?article=1385&amp;context=journal">https://pxjournal.org/cgi/viewcontent.cgi?article=1385&amp;context=journal</a>       |
| [41]             | Patient Experience Journal                   | 2019 | Engagement of patients with scleroderma to revise an internet self-management program                              | Poole JL, Newbill SL, Serrano J, Rosson D, Battyany J, Dyas L, et al.    | <a href="https://pxjournal.org/cgi/viewcontent.cgi?article=1375&amp;context=journal">https://pxjournal.org/cgi/viewcontent.cgi?article=1375&amp;context=journal</a>       |
| [56]             | Patient Experience Journal                   | 2020 | The rapid increase in telemedicine visits during COVID-19                                                          | Johnson C, Taff K, Lee BR, Montalbano A                                  | <a href="https://pxjournal.org/cgi/viewcontent.cgi?article=1475&amp;context=journal">https://pxjournal.org/cgi/viewcontent.cgi?article=1475&amp;context=journal</a>       |

| Reference Number | Publication Name              | Year | Article Title                                                                                                                                                   | Author(s)                                                                   | URL                                                                                                                                                                 |
|------------------|-------------------------------|------|-----------------------------------------------------------------------------------------------------------------------------------------------------------------|-----------------------------------------------------------------------------|---------------------------------------------------------------------------------------------------------------------------------------------------------------------|
| [60]             | Patient Experience Journal    | 2020 | Living with cardiovascular disease (CVD): Exploring the biggest challenges for people affected by CVD in the UK, and their use (or not) of online resources     | Burger S-A, Poots AJ, Perris A, Crump H, Thorne H, Hughes S, et al.         | <a href="https://pxjournal.org/cgi/viewcontent.cgi?article=1418&amp;context=journal">https://pxjournal.org/cgi/viewcontent.cgi?article=1418&amp;context=journal</a> |
| [30]             | Patient Experience Journal    | 2020 | A sociotechnical systems approach toward tailored design for personal health information management                                                             | Werner NE, Tong M, Nathan-Roberts D, Smith C, Tredinnick R, Ponto K, et al. | <a href="https://pxjournal.org/cgi/viewcontent.cgi?article=1411&amp;context=journal">https://pxjournal.org/cgi/viewcontent.cgi?article=1411&amp;context=journal</a> |
| [57]             | Patient Experience Journal    | 2021 | Comparing patient experience survey scores between telehealth and in-person ambulatory pediatric subspecialty visits                                            | Bomher ST, Wood M, Uhlhorn E, Marques S, Kwiatkowski L, Tekic N, et al.     | <a href="https://pxjournal.org/cgi/viewcontent.cgi?article=1542&amp;context=journal">https://pxjournal.org/cgi/viewcontent.cgi?article=1542&amp;context=journal</a> |
| [42]             | Patient Experience Journal    | 2021 | Delivery of patient education and support using an online digital platform for patients undergoing primary hip and knee replacement: The patient's perspectives | Baker PN, Clark NL                                                          | <a href="https://pxjournal.org/cgi/viewcontent.cgi?article=1537&amp;context=journal">https://pxjournal.org/cgi/viewcontent.cgi?article=1537&amp;context=journal</a> |
| [54]             | Patient Experience Journal    | 2021 | Patients' and family caregivers' perceptions of doctor-to-doctor advice and electronic referral notifications in Alberta                                        | Li Y, Wong A                                                                | <a href="https://pxjournal.org/cgi/viewcontent.cgi?article=1441&amp;context=journal">https://pxjournal.org/cgi/viewcontent.cgi?article=1441&amp;context=journal</a> |
| [38]             | Journal of Patient Experience | 2019 | Comparative Usability Study of a Newly Created Patient-Centered Tool and Medicare.gov Plan Finder to Help Medicare Beneficiaries Choose Prescription Drug Plans | Stults CD, Fattahi S, Meehan A, Bundorf MK, Chan AS, Pun T, et al.          | <a href="https://doi.org/10.1177/2374373518778343">https://doi.org/10.1177/2374373518778343</a>                                                                     |
| [33]             | Journal of Patient Experience | 2020 | Evaluating the Telehealth Experience of Patients With COVID-19 Symptoms: Recommendations on Best Practices                                                      | Khairat S, Pillai M, Edson B, Gianforcaro R                                 | <a href="https://journals.sagepub.com/doi/full/10.1177/2374373520952975">https://journals.sagepub.com/doi/full/10.1177/2374373520952975</a>                         |
| [31]             | Journal of Patient Experience | 2020 | COVID-19 Pandemic Accelerates Need to Improve Online Patient Engagement Practices to Enhance Patient Experience                                                 | Meyer MA                                                                    | <a href="https://journals.sagepub.com/doi/full/10.1177/2374373520959486">https://journals.sagepub.com/doi/full/10.1177/2374373520959486</a>                         |
| [51]             | Journal of Patient Experience | 2020 | Readability of Information on Smartphone Apps for Total Hip Replacement and Total Knee Replacement Surgery Patients                                             | Bahadori S, Wainwright TW, Ahmed OH                                         | <a href="https://journals.sagepub.com/doi/full/10.1177/2374373519844266">https://journals.sagepub.com/doi/full/10.1177/2374373519844266</a>                         |
| [19]             | Journal of Patient Experience | 2021 | Telehealth use and Satisfaction among U.S. Households: Results of a National Survey                                                                             | Kyle MA, Blendon RJ, Findling MG, Benson JM                                 | <a href="https://journals.sagepub.com/doi/full/10.1177/23743735211052737">https://journals.sagepub.com/doi/full/10.1177/23743735211052737</a>                       |

| Reference Number | Publication Name              | Year | Article Title                                                                                                                          | Author(s)                                                                        | URL                                                                                                                                           |
|------------------|-------------------------------|------|----------------------------------------------------------------------------------------------------------------------------------------|----------------------------------------------------------------------------------|-----------------------------------------------------------------------------------------------------------------------------------------------|
| [34]             | Journal of Patient Experience | 2021 | Response to Telemedicine Visits From Patients With Parkinsonism During the COVID-19 Pandemic on Postvisit Surveys                      | Deeb W, Hess CW, Gamez N, Patel B, Moore K, Armstrong MJ                         | <a href="https://journals.sagepub.com/doi/full/10.1177/2374373521997224">https://journals.sagepub.com/doi/full/10.1177/2374373521997224</a>   |
| [35]             | Journal of Patient Experience | 2021 | Experiences of Outpatient Clinics and Opinions of Telehealth by Caucasian and South Asian Patients' With Celiac Disease                | Muhammad H, Reeves S, Ishaq S, Jeanes Y                                          | <a href="https://journals.sagepub.com/doi/full/10.1177/23743735211018083">https://journals.sagepub.com/doi/full/10.1177/23743735211018083</a> |
| [20]             | Journal of Patient Experience | 2021 | Patient Satisfaction With Telehealth and Experiences During the COVID-19 Pandemic Among Uninsured Free Clinic Patients                 | Kamimura A, Panahi S, Meng H-W, Sundrud J, Lucero M                              | <a href="https://journals.sagepub.com/doi/full/10.1177/23743735211033107">https://journals.sagepub.com/doi/full/10.1177/23743735211033107</a> |
| [46]             | Journal of Patient Experience | 2021 | Disrupted and Restored Patient Experience With Transition to New Electronic Health Record System                                       | Tian D, Hoehner CM, Woeltje KF, Luong L, Lane MA                                 | <a href="https://journals.sagepub.com/doi/full/10.1177/23743735211034064">https://journals.sagepub.com/doi/full/10.1177/23743735211034064</a> |
| [47]             | Journal of Patient Experience | 2021 | Patient-Centered Telehealth Solution for Observed Urine Collections in Substance Use Disorder Care Delivery During COVID-19 and Beyond | Brett A, Foster H, Joseph M, Warrington JS                                       | <a href="https://journals.sagepub.com/doi/full/10.1177/23743735211033128">https://journals.sagepub.com/doi/full/10.1177/23743735211033128</a> |
| [21]             | Journal of Patient Experience | 2021 | Providing Person-Centered Care via Telemedicine in the Era of COVID-19 in Multiple Sclerosis                                           | Abbatemarco JR, Hartman J, McGinley M, Bermel RA, Boissy A, Chizmadia DT, et al. | <a href="https://journals.sagepub.com/doi/full/10.1177/2374373520981474">https://journals.sagepub.com/doi/full/10.1177/2374373520981474</a>   |
| [22]             | Journal of Patient Experience | 2021 | Factors Affecting Patient Perceptions and Satisfaction with Telemedicine in Outpatient Clinics                                         | Abdulwahab S, Zedan H                                                            | <a href="https://journals.sagepub.com/doi/full/10.1177/23743735211063780">https://journals.sagepub.com/doi/full/10.1177/23743735211063780</a> |
| [23]             | Journal of Patient Experience | 2021 | Rheumatology Patient Satisfaction With Telemedicine During the COVID-19 Pandemic in the United States                                  | Mortezavi M, Lokinen S, Garg M, Chen YL, Ramsey A                                | <a href="https://journals.sagepub.com/doi/full/10.1177/23743735211008825">https://journals.sagepub.com/doi/full/10.1177/23743735211008825</a> |
| [50]             | Journal of Patient Experience | 2021 | Bridging the Telemedicine Gap Among Seniors During the COVID-19 Pandemic                                                               | Utley LM, Manchala GS, Phillips MJ, Doshi CP, Szatalowicz VL, Boozer JR          | <a href="https://journals.sagepub.com/doi/full/10.1177/23743735211014036">https://journals.sagepub.com/doi/full/10.1177/23743735211014036</a> |
| [24]             | Journal of Patient Experience | 2021 | Patient Experiences With Telemedicine in a National Health Service Rheumatology Outpatient Department During Coronavirus Disease-19    | Jones MT, Arif R, Rai A                                                          | <a href="https://journals.sagepub.com/doi/full/10.1177/23743735211034973">https://journals.sagepub.com/doi/full/10.1177/23743735211034973</a> |
| [52]             | Journal of Patient Experience | 2021 | Rethinking Telerehabilitation: Attitudes of Physical Therapists and Patients                                                           | Saaei F, Klappa SG                                                               | <a href="https://journals.sagepub.com/doi/full/10.1177/23743735211034335">https://journals.sagepub.com/doi/full/10.1177/23743735211034335</a> |

| Reference Number | Publication Name              | Year | Article Title                                                                                                                                                                                                                  | Author(s)                                                                      | URL                                                                                                                                                                                                                                             |
|------------------|-------------------------------|------|--------------------------------------------------------------------------------------------------------------------------------------------------------------------------------------------------------------------------------|--------------------------------------------------------------------------------|-------------------------------------------------------------------------------------------------------------------------------------------------------------------------------------------------------------------------------------------------|
| [25]             | Journal of Patient Experience | 2021 | Changes in Patient Satisfaction Scores During the Early COVID-19 Pandemic                                                                                                                                                      | Maher DP, Hess D, Edwards C, Allen L                                           | <a href="https://journals.sagepub.com/doi/full/10.1177/23743735211034610">https://journals.sagepub.com/doi/full/10.1177/23743735211034610</a>                                                                                                   |
| [32]             | Journal of Patient Experience | 2021 | From the Patient's Perspective: Orthopedic Virtual Rounds                                                                                                                                                                      | Moyse T, Yates E, Fajardo V, Glorioso-Wible J, Schaffer JL, Nystrom LM, et al. | <a href="https://journals.sagepub.com/doi/full/10.1177/23743735211065269">https://journals.sagepub.com/doi/full/10.1177/23743735211065269</a>                                                                                                   |
| [26]             | Journal of Patient Experience | 2021 | Are Surgical Patients Satisfied With Remote Consultations? A Comparison of Remote Versus Conventional Outpatient Clinic Follow-Up for Surgical Patients: A Systematic Review and Meta-Analysis of Randomized Controlled Trials | Oates EV, Lim GHC, Nevins EJ, Kanakala V                                       | <a href="https://journals.sagepub.com/doi/full/10.1177/23743735211035916">https://journals.sagepub.com/doi/full/10.1177/23743735211035916</a>                                                                                                   |
| [27]             | Journal of Patient Experience | 2021 | Evaluation of Patient Experience During Virtual and In-Person Urgent Care Visits: Time and Cost Analysis                                                                                                                       | Khairat S, Lin X, Liu S, Man Z, Zaman T, Edson B, et al.                       | <a href="https://journals.sagepub.com/doi/full/10.1177/2374373520981487">https://journals.sagepub.com/doi/full/10.1177/2374373520981487</a>                                                                                                     |
| [61]             | Journal of Patient Experience | 2021 | Virtual Teaming: Leveraging Team Science Sense-Making During COVID-19                                                                                                                                                          | Portman DG, Thirlwell S, Donovan KA, Ellington L                               | <a href="https://journals.sagepub.com/doi/full/10.1177/2374373521996945">https://journals.sagepub.com/doi/full/10.1177/2374373521996945</a>                                                                                                     |
| [36]             | Journal of Patient Experience | 2021 | Cancer Treatment During COVID-19: A Qualitative Analysis of Patient-Perceived Risks and Experiences with Virtual Care                                                                                                          | Gotlib Conn L, Tahmasebi H, Meti N, Wright FC, Thawer A, Cheung M, et al.      | <a href="https://journals.sagepub.com/doi/full/10.1177/23743735211039328">https://journals.sagepub.com/doi/full/10.1177/23743735211039328</a>                                                                                                   |
| [40]             | Journal of Patient Experience | 2021 | The Virtual Care Experience of Patients Diagnosed With COVID-19                                                                                                                                                                | Raffan F, Anderson T, Sinclair T, Shaw M, Amanatidis S, Thapa R, et al.        | <a href="https://journals.sagepub.com/doi/full/10.1177/23743735211008310">https://journals.sagepub.com/doi/full/10.1177/23743735211008310</a>                                                                                                   |
| [28]             | Journal of Patient Experience | 2021 | Effect of Real-Time Feedback Devices on Primary Care Patient Experience Scores: A Cluster-Randomized Trial                                                                                                                     | Philips K, Dadlez N, Fazzari M, Samuel S, Southern W, Heo M, et al.            | <a href="https://journals.sagepub.com/doi/full/10.1177/2374373521996957">https://journals.sagepub.com/doi/full/10.1177/2374373521996957</a>                                                                                                     |
| [58]             | Journal of Patient Experience | 2021 | The Impact of the Coronavirus (COVID-19) Pandemic on Outpatient Services—An Analysis of Patient Feedback of Virtual Outpatient Clinics in a Tertiary Teaching Center With a Focus on Musculoskeletal and Rheumatology Services | Byravan S, Sunmboye K                                                          | <a href="https://journals.sagepub.com/doi/full/10.1177/23743735211008284">https://journals.sagepub.com/doi/full/10.1177/23743735211008284</a>                                                                                                   |
| [37]             | Computer Informatics Nursing  | 2019 | Web-Based Tailored Nursing Intervention to Support Medication Self-management                                                                                                                                                  | Côté J, Fortin M-C, Auger P, Rouleau G, Dubois S, Vaillant I, et al.           | <a href="https://journals.lww.com/cinjournl/Fulltext/2019/11000/Web_Based_Tailored_Nursing_Intervention_to_Support.3.aspx">https://journals.lww.com/cinjournl/Fulltext/2019/11000/Web_Based_Tailored_Nursing_Intervention_to_Support.3.aspx</a> |

| Reference Number | Publication Name             | Year | Article Title                                                         | Author(s)                          | URL                                                                                                                                                                                                                                             |
|------------------|------------------------------|------|-----------------------------------------------------------------------|------------------------------------|-------------------------------------------------------------------------------------------------------------------------------------------------------------------------------------------------------------------------------------------------|
| [48]             | Computer Informatics Nursing | 2020 | A Qualitative Study of the Experience of Kidney Transplant Recipients | Choi J, Baker E, Nalawade S, Lee H | <a href="https://journals.lww.com/cinjournal/FullText/2020/02000/Steps_to_Develop_a_Mobile_App_for_Pain_Assessment.5.aspx">https://journals.lww.com/cinjournal/FullText/2020/02000/Steps_to_Develop_a_Mobile_App_for_Pain_Assessment.5.aspx</a> |
| [53]             | Computer Informatics Nursing | 2021 | Electronic Health Record Transition: The Patient Experience           | Monturo C, Brockway C, Ginev A     | <a href="https://europepmc.org/article/med/34313622">https://europepmc.org/article/med/34313622</a>                                                                                                                                             |
